# Supplementary material for: Active maintenance of endothelial cells prevents kidney fibrosis
Source: PubMed Central journal article supplement — Kidney Res Clin Pract. 2017 Dec 31;36(4):329–41. doi: 10.23876/j.krcp.2017.36.4.329 (PMC5743042; doi:10.23876/j.krcp.2017.36.4.329), 2017-12-31
Supplement: krcp-36-329_suppl.pdf [file krcp-36-329_suppl.pdf]

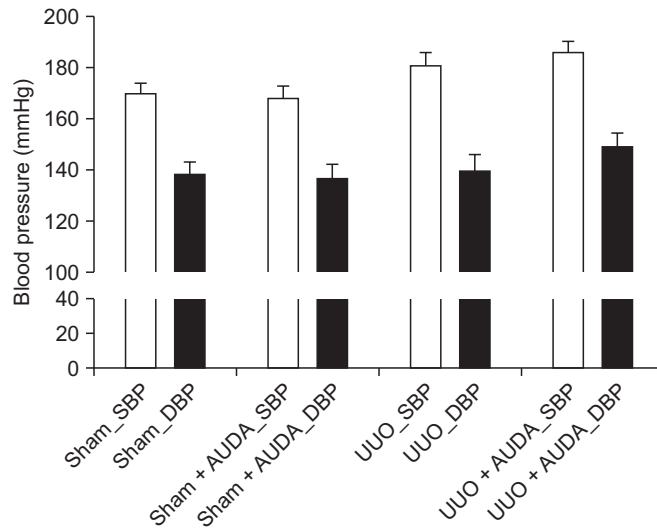

**Supplementary figure 1.** Effect of soluble epoxide hydrolase sEH inhibition on blood pressure.

AUDA, 12-(3-adamantan-1-ylureido)-dodecanoic acid; DBP, diastolic blood pressure; SBP, systolic blood pressure; UUO, unilateral ureteral obstruction.

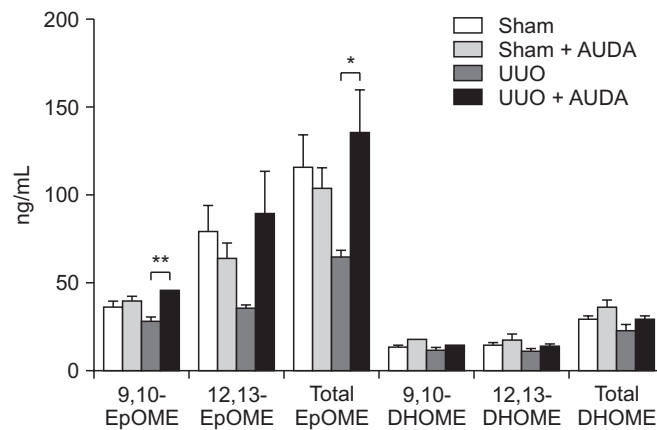

**Supplementary figure 2.** Regulation of soluble epoxide hydrolase (sEH) activity by 12-(3-adamantan-1-ylureido)-dodecanoic acid (AUDA) treatment in a unilateral ureteral obstruction (UUO) model. Plasma concentrations of epoxyoctadecenoic acid (EpOME) and dihydroxyoctadec-12-enoic acid (DHOME) levels were measured to investigate the enzyme activity of sEH. 9,10-, 12,13-, and total EpOME plasma concentrations were significantly elevated in response to AUDA in the UUO model.

\* $P < 0.05$ , \*\* $P < 0.01$ ; by ANOVA test.
